# Supplementary material for: Development and validation of novel prognostic models for zinc finger proteins-related genes in soft tissue sarcoma
Source: publisher site journal article supplement (doi:10.18632/aging.204682), 2023-04-26
Supplement: Supplementary file [file aging-v15i8-204682-supplementary-material-SD3.pdf]

**Supplementary Table 2. The sequences of primer and siRNA oligonucleotides.**

| <b>ZNF141</b> | <b>F</b> | <b>5'- GACGGTCCACAGATCGGAG-3'</b> |
|---------------|----------|-----------------------------------|
|               | R        | 5'- TGACTCAGGAGCGAAAATTGTT -3'    |
| GAPDH         | F        | 5'- ACAACTTTGGTATCGTGGAAG -3'     |
|               | R        | 5'- GCCATCACGCCACAGTTTC -3'       |
| si-1          | SS       | 5'-GUGUCAAGUUGUUAGUAA-3'          |
|               | AS       | 5'-UUACUAACAACUUUGACAC-3'         |
| si-2          | SS       | 5'-GAGAUGUGAUGUUGGAGAA-3'         |
|               | AS       | 5'-UUCUCCAACAUCACAUCUC-3'         |
