# Supplementary material for: Development and validation of novel prognostic models for zinc finger proteins-related genes in soft tissue sarcoma
Source: Aging (Albany NY). 2023 Apr 26;15(8):3171–90. doi: 10.18632/aging.204682 (PMC10188339; doi:10.18632/aging.204682)
Supplement: Supplementary Table 3 [file aging-15-204682-s004.xls]

Supplementary Table 3. Differentially expressed ZNFs in GSE2719.
Gene	logFC	AveExpr	t	adj.P.Val
BARD1	3.001724151	7.778363167	8.615931967	6.73E-09
RORC	-2.302158316	6.318836498	-7.922159053	4.61E-08
ZNF528	2.099496068	6.922185322	7.603246442	1.03E-07
ZNF93	1.44642323	8.502188846	7.491941148	1.11E-07
ZNF146	1.662993258	9.88142028	7.448771286	1.11E-07
ZNF426	2.432340438	6.291478983	7.322771532	1.50E-07
ZBED8	1.567716819	7.731769831	7.273760352	1.55E-07
DBF4	1.483308844	6.894680643	7.081044481	2.82E-07
SP3	1.589316512	10.07286953	6.930240156	4.46E-07
HLTF	1.529162896	9.675942631	6.740820941	6.87E-07
SNAI2	2.462504033	9.849604181	6.415829709	2.17E-06
ADNP	1.194982775	10.26487174	6.290153513	3.24E-06
NR0B2	-2.144661573	6.69499768	-6.270074905	3.26E-06
ZNF322	1.161690923	7.634775113	6.12817239	4.91E-06
ZNF43	1.076848972	7.655737857	6.094199032	5.27E-06
ZNF443	1.266535755	6.488362094	5.951425539	8.51E-06
ZNF140	1.741485232	7.561659094	5.92527614	8.51E-06
REPIN1	-1.316989161	9.455969969	-5.785139238	1.37E-05
MNAT1	1.88845895	7.298058046	5.766323155	1.41E-05
RNF128	-3.416130252	5.558470011	-5.642413122	2.13E-05
EEA1	1.099157608	6.400456917	5.538700549	2.89E-05
ZNF292	1.619665064	8.914039735	5.482720779	3.30E-05
ZFYVE16	1.713183348	8.288515465	5.454297394	3.42E-05
ZNF84	1.501944841	7.549666654	5.364938666	4.59E-05
ZNF227	1.826579763	6.699609522	5.352337052	4.65E-05
ZNF12	1.436086193	8.858261915	5.319558375	5.00E-05
KRBOX4	1.667050042	7.372038139	5.315825004	5.00E-05
CBFA2T3	-1.490943024	7.436317443	-5.272819577	5.53E-05
ZNF430	1.293349325	7.974323604	5.240651597	5.88E-05
ZNHIT6	1.330736434	8.454728178	5.209475461	6.42E-05
ZNF551	1.488452011	5.804980426	5.188782297	6.75E-05
ZNF267	1.362155422	7.513871356	5.173872988	6.82E-05
TRIM9	2.140712978	6.137344644	5.153008776	7.02E-05
RFWD3	1.48382467	6.90296727	5.14777914	7.02E-05
ZFP30	1.433806505	7.31532692	5.145341624	7.02E-05
PHF20L1	1.280172977	7.058059426	5.113921244	7.69E-05
ZBTB16	-1.743173531	9.017929152	-4.944302917	0.000128778
LIMS2	-1.18158967	9.031932676	-4.941494226	0.000128778
OVOL2	-1.102038155	6.592257594	-4.89083541	0.000151283
ZFP69B	1.32736528	5.709657222	4.874733725	0.000154262
RNF43	-1.573114473	6.584956963	-4.863347363	0.000157707
NR4A1	-1.161305851	8.033503294	-4.844344545	0.000162972
ZZZ3	1.065772733	8.817909898	4.844021498	0.000162972
ZBED5	1.260986245	10.04139408	4.805182441	0.000178324
ZNF268	1.388357425	7.021030498	4.785537607	0.00018729
SP1	1.747903528	6.044678617	4.766290082	0.000194086
ZNF302	1.337625621	7.964448335	4.75262832	0.000200475
DNMT1	1.010970431	9.382174598	4.671545602	0.000258424
TRPS1	1.696490355	8.593877007	4.662539721	0.000262716
RSF1	1.419441689	6.546015978	4.606383718	0.000301735
ZXDC	-1.574685533	7.137232469	-4.606242875	0.000301735
ZNF180	1.228509645	6.613473793	4.591705257	0.000311846
ZBTB18	-1.345212235	7.909390683	-4.588785825	0.000311846
TOPORS	1.053367336	7.126749665	4.581358888	0.000314307
XIAP	1.065171728	6.336051406	4.571169182	0.000314307
ZNF281	1.015548284	8.500049765	4.555424193	0.000323551
ZNF230	1.463543403	5.267530902	4.506355295	0.000371262
ZNF214	1.540538505	5.262648822	4.496920983	0.000377024
ZBTB10	1.521866856	5.895058576	4.47958036	0.000395485
ZNF217	1.652722146	8.354918307	4.421611349	0.000471425
MEX3C	1.215811417	8.147383004	4.412300724	0.000481108
RNF138	1.091075133	9.424895554	4.38180443	0.000521986
ZIC3	1.709941119	5.256960048	4.363456223	0.000543491
ZHX2	-1.116263483	8.621095054	-4.311624073	0.000620943
SUZ12	1.079550292	9.674477878	4.302478971	0.000630044
ZMYM1	1.034481996	7.267390493	4.249766515	0.000727143
ZNF813	1.131717265	6.259613298	4.197859844	0.000825283
BAZ1A	1.045853417	8.105592193	4.19760267	0.000825283
ZNF141	1.434116736	4.460845743	4.189759817	0.000837408
ABLIM1	-1.207583641	9.308368393	-4.187322763	0.000837408
ZNF23	1.683126241	5.522837307	4.184844117	0.000837408
NEIL3	1.100762239	7.190966391	4.173913547	0.000845318
PDLIM4	1.133901928	7.73290195	4.151004997	0.000904218
ZNF184	1.38760513	6.541245687	4.132277215	0.000953954
KLF5	-1.558133481	7.640480281	-4.037262743	0.001262236
ZC3H15	1.00977224	9.623987544	4.008580545	0.001352489
ZIC1	3.343093113	7.374084704	3.959966935	0.001547296
MORC3	1.077681893	8.052245119	3.900011728	0.001821508
RFPL2	-1.200347826	6.251935306	-3.872592468	0.001959758
MDM4	1.365732641	4.814185563	3.852357606	0.002075966
PHF14	1.331306723	5.080316113	3.845212333	0.002108112
RNFT1	1.344051209	5.230893278	3.796180601	0.002394526
TRAIP	1.355770919	6.133413113	3.761883962	0.002594898
ESRRG	-1.517690377	6.26245453	-3.607691421	0.003859611
LDB3	-1.278920782	7.060702711	-3.526644314	0.004715134
PDLIM1	-1.117865288	10.69921464	-3.464789022	0.005397817
ZNF107	1.062711239	5.845332546	3.454122208	0.00554375
ZNHIT2	-1.085829106	5.835738937	-3.423798598	0.00583945
ZNF750	-1.724043529	2.953126031	-3.333310296	0.007339817
ZNF83	1.325451405	7.274925239	3.315918409	0.007689982
THAP1	1.213044216	7.015828343	3.258721849	0.008562098
ZNF639	1.236266467	5.874657448	3.251099494	0.008626449
ZNF428	1.313567205	7.901576939	3.228321758	0.009179836
LHX2	1.60364426	6.466567661	3.207696422	0.00970499
RNF208	-1.114838374	6.847225419	-3.201159561	0.009756272
BCL11A	-1.034780794	7.317538202	-3.196203822	0.009843226
ZFP37	1.033126063	6.224818541	3.145918946	0.010958076
KLF15	-1.006360722	6.30325995	-3.103970439	0.011994798
ZNF532	1.444456279	9.379125524	3.098878666	0.012117195
ZNF195	1.021137955	7.75797943	3.083510282	0.012551278
ZEB2	1.373551308	7.190684098	3.072689774	0.012832307
DZIP1	1.076318244	7.770852287	3.063013698	0.013087017
ZDHHC14	-1.152417583	7.486479439	-2.889245567	0.018839011
NR3C2	-1.215228049	6.722150378	-2.883175626	0.018997877
ZNF385D	1.422046888	5.097091704	2.882029412	0.018997877
KDM5D	-1.736271704	7.320069852	-2.850581352	0.020048378
ZNF165	-1.112131262	3.126745202	-2.85016109	0.020048378
ZFHX4	1.09835957	8.926610763	2.752553022	0.025374845
ZNF675	1.045638698	5.133461291	2.711141229	0.028042115
HIC1	1.318555913	5.948397802	2.663023364	0.030863998
